# Supplementary material for: Sensitive and rapid determination of the iodine/calcium ratio in carbonate rock samples by ICP-MS based on solution cathode glow discharge sampling
Source: Royal Society of Chemistry journal article supplement (doi:10.1039/d4ja00264d), 2024-01-01
Supplement: d4ja00264d1.pdf [file d4ja00264d1.pdf]

## Supplementary Information

### **Sensitive and Rapid Determination of Iodine/Calcium Ratio in Carbonate Rock Samples by ICP-MS Based on Solution Cathode Glow Discharge Sampling**

Xuan Wang<sup>a</sup>, Xing Liu<sup>a\*</sup>, Lanlan Jin<sup>a</sup>, Zhenli Zhu<sup>ab\*</sup>, Junhang Dong<sup>a</sup>, Pengju Xing<sup>a</sup>, Linjie Chen<sup>a</sup>,

Yuanhui Geng<sup>a</sup>, Jingwen Zhang<sup>a</sup>, Hao Tong<sup>a</sup>, Hongtao Zheng<sup>b</sup>, Min Zhang<sup>c</sup>, Shenghong Hu<sup>a</sup>

<sup>a</sup>State Key Laboratory of Biogeology and Environmental Geology, China University of Geosciences, Wuhan, 430074, China.

<sup>b</sup>Faculty of Materials Science and Chemistry, China University of Geosciences, Wuhan, 430074, China.

<sup>c</sup>Office of Laboratory and Equipment Management, China University of Geosciences, Wuhan, 430074, China.

**Table S1.** Operating conditions of ICP-MS and SCGD reactor

| Operating conditions       | Parameters               |
|----------------------------|--------------------------|
| rf power                   | 1550 V                   |
| sampling depth             | 8 mm                     |
| cool Ar gas flow rate      | 18.0 L min <sup>-1</sup> |
| nebulizer Ar gas flow rate | 1.0 L min <sup>-1</sup>  |
| make up Ar gas flow rate   | 0.1 L min <sup>-1</sup>  |
| discharge current          | 40 mA                    |
| discharge gap              | 3 mm                     |
| sample flow rate           | 2.5 mL min <sup>-1</sup> |
| heating temperature        | 80 °C                    |

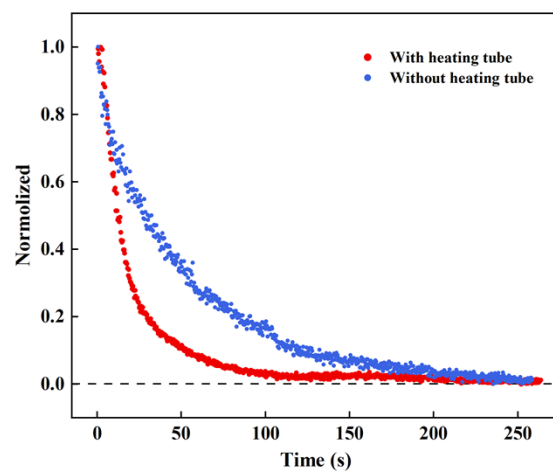

**Fig S1.** Comparison of cleaning time with/without heating the device.
